# Supplementary material for: Clowning in children undergoing potentially anxiety-provoking procedures: a systematic review and meta-analysis
Source: Springer Nature journal article supplement (doi:10.1186/s13643-019-1095-4), 2019-07-19
Supplement: MOESM7 [file 16965620]

Summary of findings:

## Clowning compared to Midazolam in children undergoing potentially anxiety-provoking procedures

Patient or population: children undergoing potentially anxiety-provoking procedures

Setting: any setting

Intervention: clowning

Comparison: Midazolam

| Outcomes                                                                                  | Anticipated absolute effects* (95% CI) |                                                                                                                             | Relative effect (95% CI) | № of participants (studies) | Certainty of the evidence (GRADE)         | Comments |
|-------------------------------------------------------------------------------------------|----------------------------------------|-----------------------------------------------------------------------------------------------------------------------------|--------------------------|-----------------------------|-------------------------------------------|----------|
|                                                                                           | Risk with Midazolam                    | Risk with clowning                                                                                                          |                          |                             |                                           |          |
| Children's anxiety during preoperative time assessed with: m-YPAS<br>Scale from: 0 to 100 |                                        | The mean children's anxiety during preoperative time in the intervention group was 7.6 lower (11.73 lower to 3.47 lower)    | -                        | 93 (2 RCTs)                 | ⊕○○○<br>VERY LOW <sup>a,b,c,d,e,f</sup>   |          |
| Children's anxiety in induction room assessed with: m-YPAS<br>Scale from: 0 to 100        |                                        | The mean children's anxiety in induction room in the intervention group was 9.63 lower (21.04 lower to 1.77 higher)         | -                        | 93 (2 RCTs)                 | ⊕○○○<br>VERY LOW <sup>a,b,c,d,e,f,g</sup> |          |
| Children's anxiety during mask application assessed with: m-YPAS<br>Scale from: 0 to 100  |                                        | The mean children's anxiety during mask application in the intervention group was 12.8 higher (3.65 higher to 21.95 higher) | -                        | 43 (1 RCT)                  | ⊕○○○<br>VERY LOW <sup>a,b,c,d,e,f,h</sup> |          |
| Parental anxiety - State anxiety assessed with: STAI Y-1<br>Scale from: 20 to 80          |                                        | The mean parental anxiety - State anxiety in the intervention group was 21.1 higher (13.95 higher to 28.25 higher)          | -                        | 50 (1 RCT)                  | ⊕○○○<br>VERY LOW <sup>a,b,c,d,f,i</sup>   |          |
| Parental anxiety - Trait anxiety assessed with: STAI Y-2<br>Scale from: 20 to 80          |                                        | The mean parental anxiety - Trait anxiety in the intervention group was 4.2 lower (13.7 lower to 5.3 higher)                | -                        | 50 (1 RCT)                  | ⊕○○○<br>VERY LOW <sup>a,b,c,d,f,i</sup>   |          |

\*The risk in the intervention group (and its 95% confidence interval) is based on the assumed risk in the comparison group and the relative effect of the intervention (and its 95% CI).

CI: Confidence interval; MD: Mean difference

Summary of findings:

---

## Clowning compared to Midazolam in children undergoing potentially anxiety-provoking procedures

---

**Patient or population:** children undergoing potentially anxiety-provoking procedures

**Setting:** any setting

**Intervention:** clowning

**Comparison:** Midazolam

| Outcomes | Anticipated absolute effects* (95% CI) |                    | Relative effect (95% CI) | № of participants (studies) | Certainty of the evidence (GRADE) | Comments |
|----------|----------------------------------------|--------------------|--------------------------|-----------------------------|-----------------------------------|----------|
|          | Risk with Midazolam                    | Risk with clowning |                          |                             |                                   |          |

**GRADE Working Group grades of evidence**

**High certainty:** We are very confident that the true effect lies close to that of the estimate of the effect

**Moderate certainty:** We are moderately confident in the effect estimate: The true effect is likely to be close to the estimate of the effect, but there is a possibility that it is substantially different

**Low certainty:** Our confidence in the effect estimate is limited: The true effect may be substantially different from the estimate of the effect

**Very low certainty:** We have very little confidence in the effect estimate: The true effect is likely to be substantially different from the estimate of effect

---

## Explanations

- a. Unclear risk of selection bias across the studies reporting this outcome.
- b. High risk of performance bias across the studies reporting this outcome.
- c. High risk of detection bias across the studies reporting this outcome.
- d. Unclear risk of attrition bias across the studies reporting this outcome.
- e. High risk of reporting bias across the studies reporting this outcome.
- f. Sample size less than 400
- g. Substantial heterogeneity
- h. Unclear risk of detection bias across the studies reporting this outcome.
- i. Unclear risk of reporting bias across the studies reporting this outcome.
