# Supplementary material for: Clowning in children undergoing potentially anxiety-provoking procedures: a systematic review and meta-analysis
Source: Springer Nature journal article supplement (doi:10.1186/s13643-019-1095-4), 2019-07-19
Supplement: MOESM8 [file 16965620]

Summary of findings:

## Clowning compared to child life program in children undergoing potentially anxiety-provoking procedures

**Patient or population:** children undergoing potentially anxiety-provoking procedures

**Setting:** any setting

**Intervention:** clowning

**Comparison:** child life program

| Outcomes                                                                                      | Anticipated absolute effects* (95% CI) |                                                                                                                               | Relative effect (95% CI) | № of participants (studies) | Certainty of the evidence (GRADE)   | Comments |
|-----------------------------------------------------------------------------------------------|----------------------------------------|-------------------------------------------------------------------------------------------------------------------------------|--------------------------|-----------------------------|-------------------------------------|----------|
|                                                                                               | Risk with child life program           | Risk with clowning                                                                                                            |                          |                             |                                     |          |
| Children's anxiety in patient room assessed with: m-YPAS<br>Scale from: 0 to 100              |                                        | The mean children's anxiety in patient room in the intervention group was 1.4 higher (0.25 higher to 2.55 higher)             | -                        | 84 (1 RCT)                  | ⊕○○○<br>VERY LOW <sup>a,b,c,d</sup> |          |
| Children's anxiety during physician examination assessed with: m-YPAS<br>Scale from: 0 to 100 |                                        | The mean children's anxiety during physician examination in the intervention group was 1.2 higher (0.11 lower to 2.51 higher) | -                        | 84 (1 RCT)                  | ⊕○○○<br>VERY LOW <sup>a,b,c,d</sup> |          |

\*The risk in the intervention group (and its 95% confidence interval) is based on the assumed risk in the comparison group and the relative effect of the intervention (and its 95% CI).

CI: Confidence interval; MD: Mean difference

### GRADE Working Group grades of evidence

**High certainty:** We are very confident that the true effect lies close to that of the estimate of the effect

**Moderate certainty:** We are moderately confident in the effect estimate: The true effect is likely to be close to the estimate of the effect, but there is a possibility that it is substantially different

**Low certainty:** Our confidence in the effect estimate is limited: The true effect may be substantially different from the estimate of the effect

**Very low certainty:** We have very little confidence in the effect estimate: The true effect is likely to be substantially different from the estimate of effect

## Explanations

- a. High risk of performance bias across the studies reporting this outcome.
- b. High risk of attrition bias across the studies reporting this outcome.
- c. Unclear risk of reporting bias across the studies reporting this outcome.
- d. Sample size less than 400
